# Supplementary material for: Low-cost and massive preparation of nitrogen-doped porous carbon for supercapacitor application
Source: Royal Society of Chemistry journal article supplement (doi:10.1039/c6ra28354c), 2017-01-01
Supplement: c6ra28354c1.pdf [file c6ra28354c1.pdf]

## Electronic Supplementary Information (ESI) for

### Low-cost and massive preparation of nitrogen-doped porous carbon for supercapacitor application

Yanxia Hao,<sup>ab</sup> Feng Xu,<sup>ab</sup> Meng Qian,<sup>ab</sup> Jijian Xu,<sup>a</sup> Wei Zhao,<sup>a</sup> and Fuqiang Huang<sup>\*ac</sup>

<sup>a</sup> State Key Laboratory of High Performance Ceramics and Superfine Microstructure, Shanghai Institute of Ceramics, Chinese Academy of Sciences, Shanghai 200050, P.R. China

<sup>b</sup> University of Chinese Academy of Sciences, 19 Yuquan Road, Beijing 100049, P.R. China.

<sup>c</sup> Beijing National Laboratory for Molecular Sciences and State Key Laboratory of Rare Earth Materials Chemistry and Applications, College of Chemistry and Molecular Engineering, Peking University, Beijing 100871, P.R. China

Corresponding author: [huangfq@mail.sic.ac.cn](mailto:huangfq@mail.sic.ac.cn)

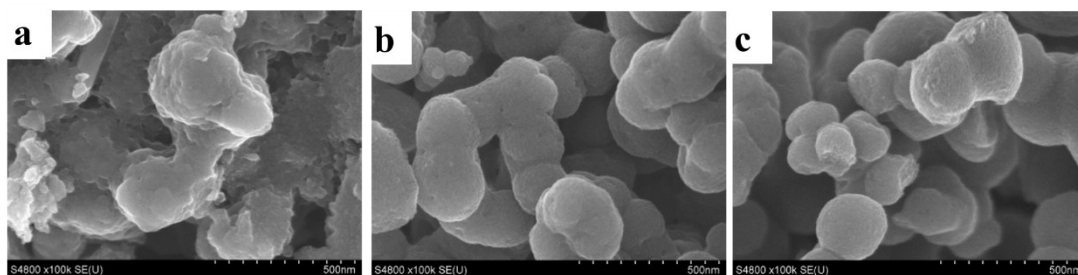

**Fig. S1** SEM images of NPC-0(a), NPC-0.25(b) and NPC-0.5(c) with higher magnification.

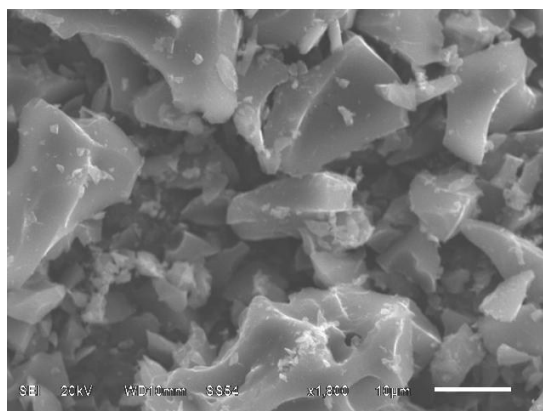

**Fig. S2** SEM image of PC.

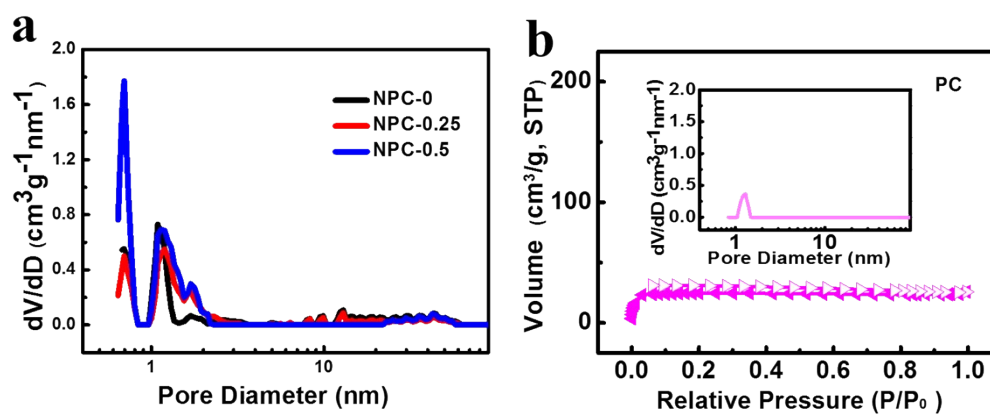

**Fig. S3** (a) Pore size distribution of NPC-0, NPC-0.25, and NPC-0.5. (b)  $\text{N}_2$  adsorption-desorption isotherm and pore size distribution of PC.

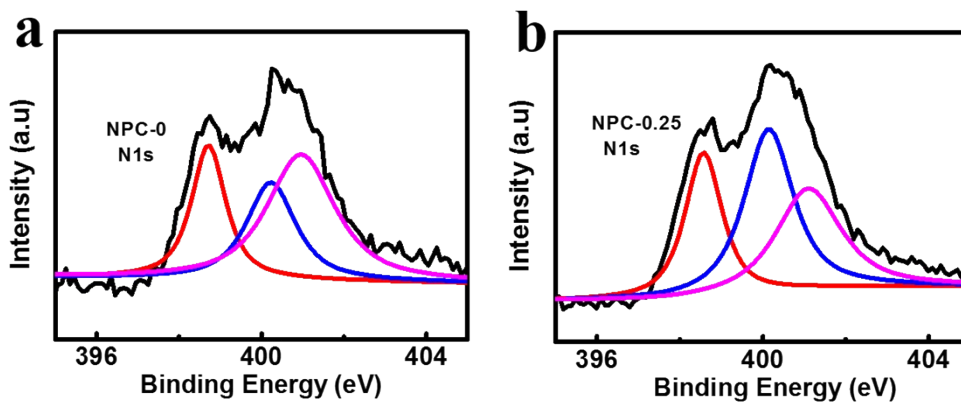

**Fig. S4** High-resolution N1s spectra of NPC-0 (a) and NPC-0.25 (b)

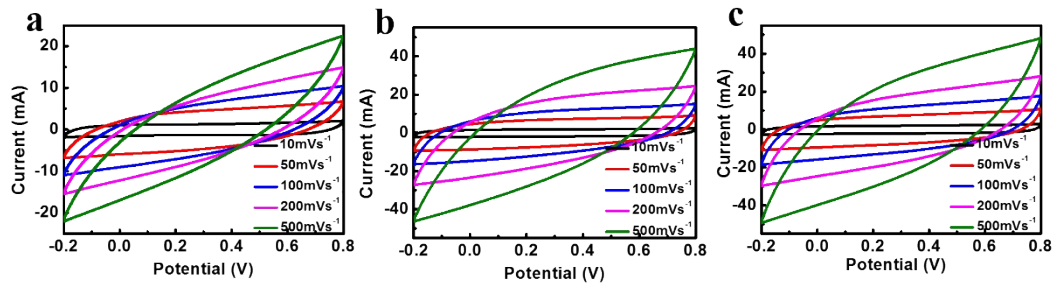

**Fig. S5** CV curves at different scan rates of NPC-0 (a), NPC-0.25 (b) and NPC-0.5 (c)

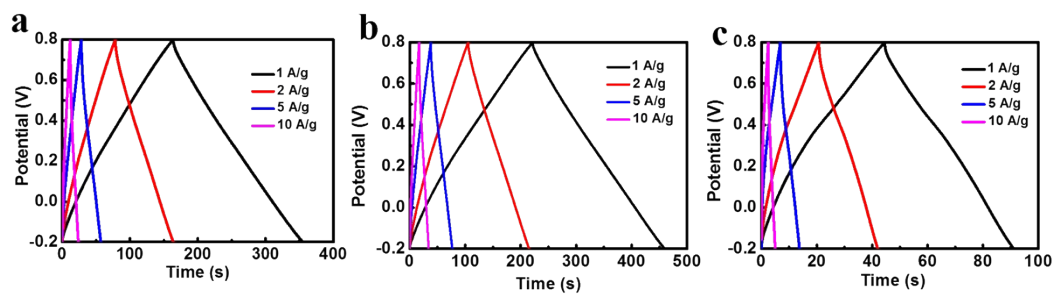

**Fig. S6** GCD curves at different current densities of NPC-0 (a), NPC-0.25 (b) and PC (c)
